# Supplementary material for: Phylogenetic Analyses and Characterization of RNase X25 from Drosophila melanogaster Suggest a Conserved Housekeeping Role and Additional Functions for RNase T2 Enzymes in Protostomes
Source: PubMed Central journal article supplement (PMC4136927; doi:10.1371/journal.pone.0105444), 2014-08-18
Supplement: pone.0105444.s001.pdf [file pone.0105444.s001.pdf]

## Supplemental Figure S1

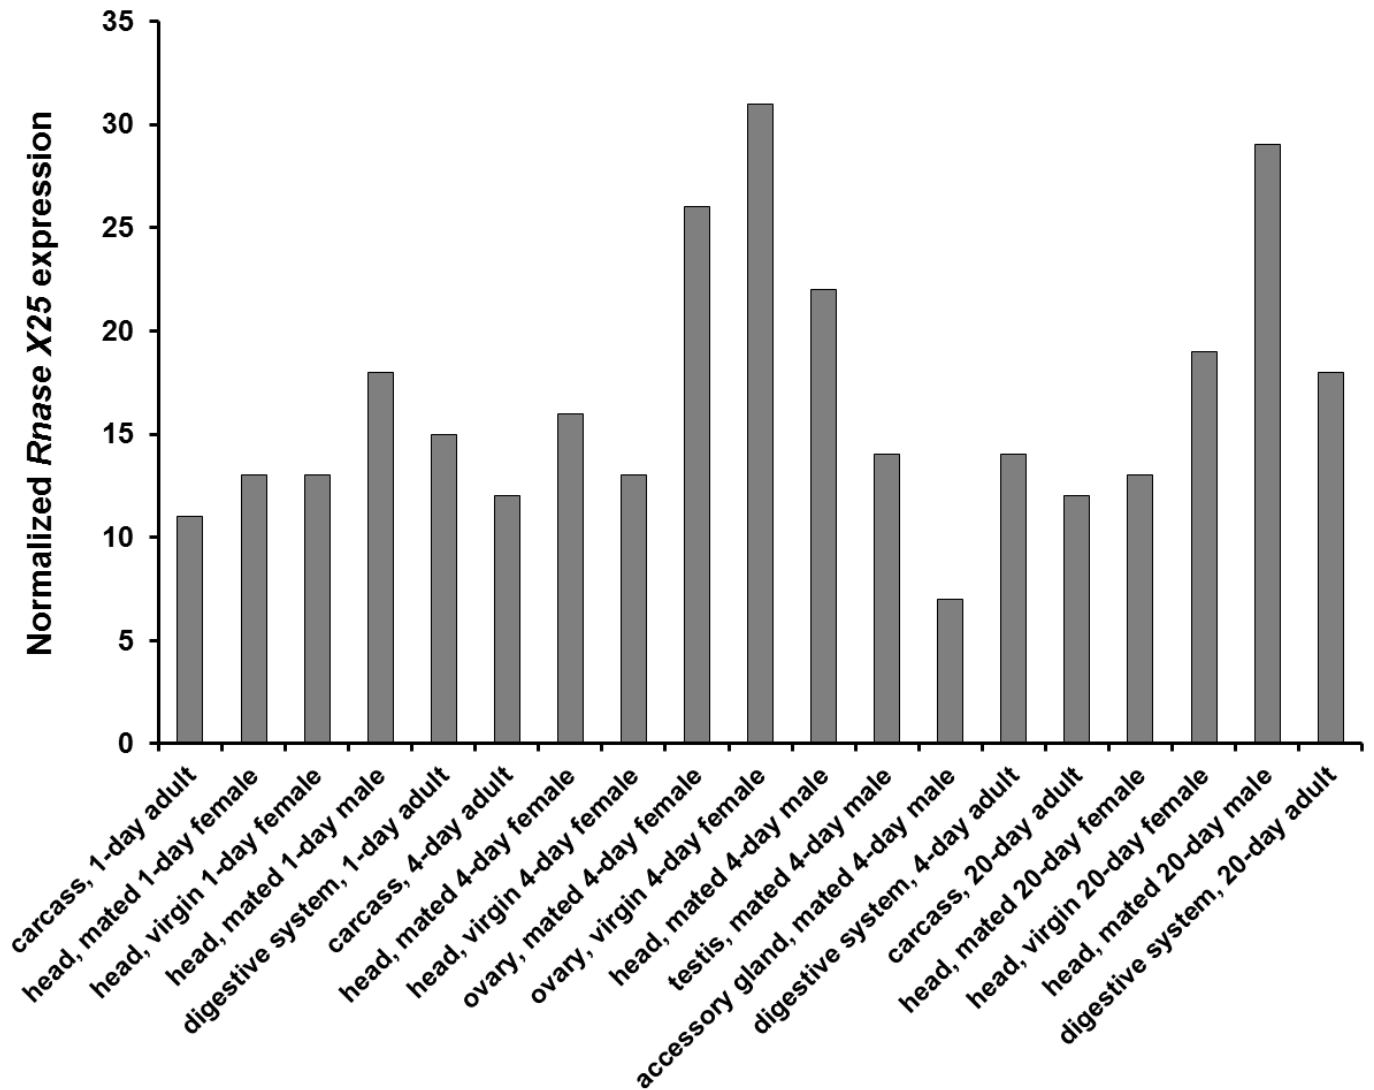

**Supplemental Figure S1.** Expression profile of *RNase X25* in different adult tissues, obtained from the modENCODE database through a query in FlyBase (<http://flybase.org>). Data were obtained through RNA-Seq analysis of the tissues described in the figure, and were reported as RPKM (Reads per kilo base per million).
