# Supplementary material for: Phylogenetic Analyses and Characterization of RNase X25 from Drosophila melanogaster Suggest a Conserved Housekeeping Role and Additional Functions for RNase T2 Enzymes in Protostomes
Source: PubMed Central journal article supplement (PMC4136927; doi:10.1371/journal.pone.0105444), 2014-08-18
Supplement: pone.0105444.s002.pdf [file pone.0105444.s002.pdf]

## Supplemental Figure S2

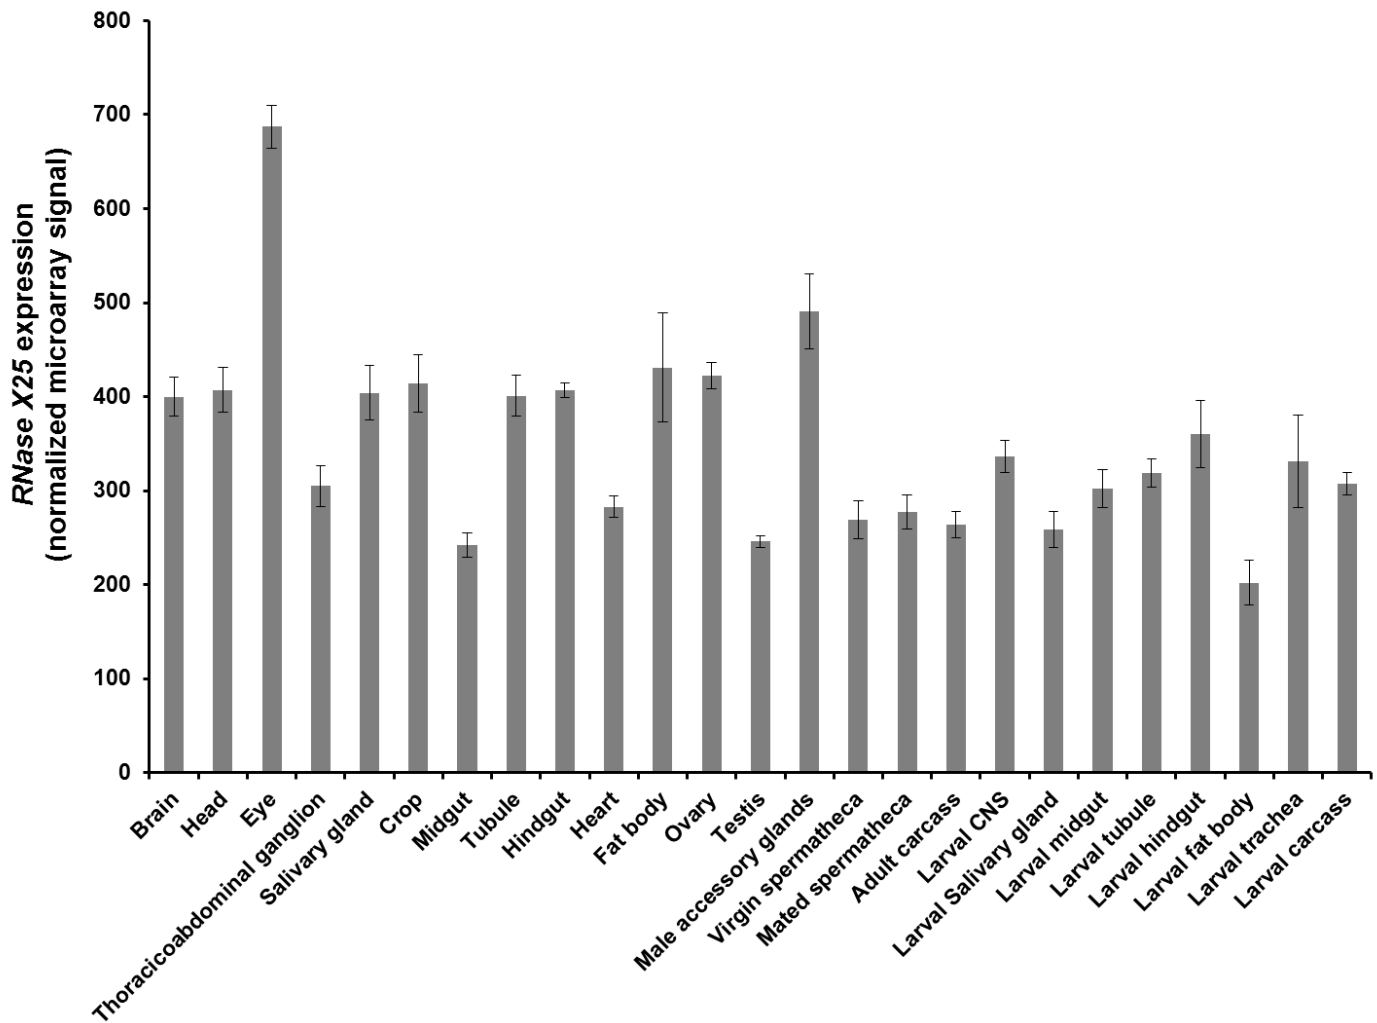

**Supplemental Figure S2.** Expression profile of *RNase X25* in different adult and larval tissues, obtained from the FlyAtlas database (<http://flyatlas.org>). Data were obtained through Affymetrix microarray chip analysis of the tissues described in the figure, and were reported as average normalized signal intensity (4 chips per sample) +/- standard error.
