# Supplementary material for: Phylogenetic Analyses and Characterization of RNase X25 from Drosophila melanogaster Suggest a Conserved Housekeeping Role and Additional Functions for RNase T2 Enzymes in Protostomes
Source: PubMed Central journal article supplement (PMC4136927; doi:10.1371/journal.pone.0105444), 2014-08-18
Supplement: pone.0105444.s003.pdf [file pone.0105444.s003.pdf]

**Supplemental Table S1.** Regulation of RNase X25 expression under nutritional stress or other conditions, obtained from public databases or the literature

| Sample source                                         | Treatment/condition          | Expression                 | Reference             |
|-------------------------------------------------------|------------------------------|----------------------------|-----------------------|
| 2 <sup>nd</sup> instar larvae                         | Fed w/ sugar                 | No Change <sup>1</sup>     | Zinke et al., 2002    |
| 2 <sup>nd</sup> instar larvae                         | Starvation                   | No Change <sup>1</sup>     | Zinke et al., 2002    |
| y w flies                                             | Fed w/ yeast                 | Downregulated <sup>2</sup> | Gershman et al., 2007 |
| 3 <sup>rd</sup> instar <i>W<sup>1118</sup></i> larvae | Fed w/ wheat germ agglutinin | Upregulated                | Li et al., 2009       |
| 3 <sup>rd</sup> instar <i>W<sup>1118</sup></i> larvae | Starvation                   | No Change                  | Li et al., 2009       |
| 2 <sup>nd</sup> instar larvae                         | Starvation                   | Upregulated                | Palanker et al., 2009 |
| Oregon R adults                                       | Fed w/ pyrethrum             | Upregulated                | Jensen et al., 2006   |
| Cultured Kc167 cells                                  | Treated w/ Ecdysone          | Downregulated              | Akdemir et al., 2007  |
| Cultured Kc167 cells                                  | Exposed to $\gamma$ -ray     | Upregulated                | Akdemir et al., 2007  |

#### Footnotes

<sup>1</sup> Only transcripts with 4 fold or more change in expression were reported.

<sup>2</sup> In this experiment, flies were yeast-deprived for 4 days and then refeed with yeast-containing media. Thus, downregulation upon refeeding could indicate upregulation of RNase X25 during the low nutrient period.

#### References

Akdemir F, Christich A, Sogame N, Chappo J, Abrams JM (2007) p53 directs focused genomic responses in *Drosophila*. *Oncogene* 26: 5184-5193.

Gershman B, Puig O, Hang L, Peitzsch RM, Tatar M, Garofalo RS (2007) High-resolution dynamics of the transcriptional response to nutrition in *Drosophila*: a key role for dFOXO. *Physiol Genomics* 29: 24-34.

Jensen HR, Scott IM, Sims SR, Trudeau VL, Arnason JT (2006) The effect of a synergistic concentration of a *Piper nigrum* extract used in conjunction with pyrethrum upon gene expression in *Drosophila melanogaster*. *Insect Mol Biol* 15: 329-339.

Li HM, Sun L, Mittapalli O, Muir WM, Xie J, Schemerhorn BJ, Sun W, Pittendrigh BR, Murdock LL (2009) Transcriptional signatures in response to wheat germ agglutinin and starvation in *Drosophila melanogaster* larval midgut. *Insect Mol Biol* 18: 21-31.

Palanker L, Tennessen JM, Lam G, Thummel CS (2009) *Drosophila* HNF4 regulates lipid mobilization and beta-oxidation. *Cell Metab* 9: 228-239.

Zinke I, Schutz CS, Katzenberger JD, Bauer M, Pankratz MJ (2002) Nutrient control of gene expression in *Drosophila*: microarray analysis of starvation and sugar-dependent response. *EMBO J* 21: 6162-6173
